# Supplementary material for: Inhaled formoterol impairs aerobic exercise capacity in endurance-trained individuals: a randomised controlled trial
Source: PubMed Central journal article supplement — ERJ Open Res. 2023 Apr 24;9(2):00643-2022. doi: 10.1183/23120541.00643-2022 (PMC10123513; doi:10.1183/23120541.00643-2022), 2023-04-24
Supplement: 00643-2022.supplementary_results.pdf [file 00643-2022.supplementary_results.pdf]

*Participants*

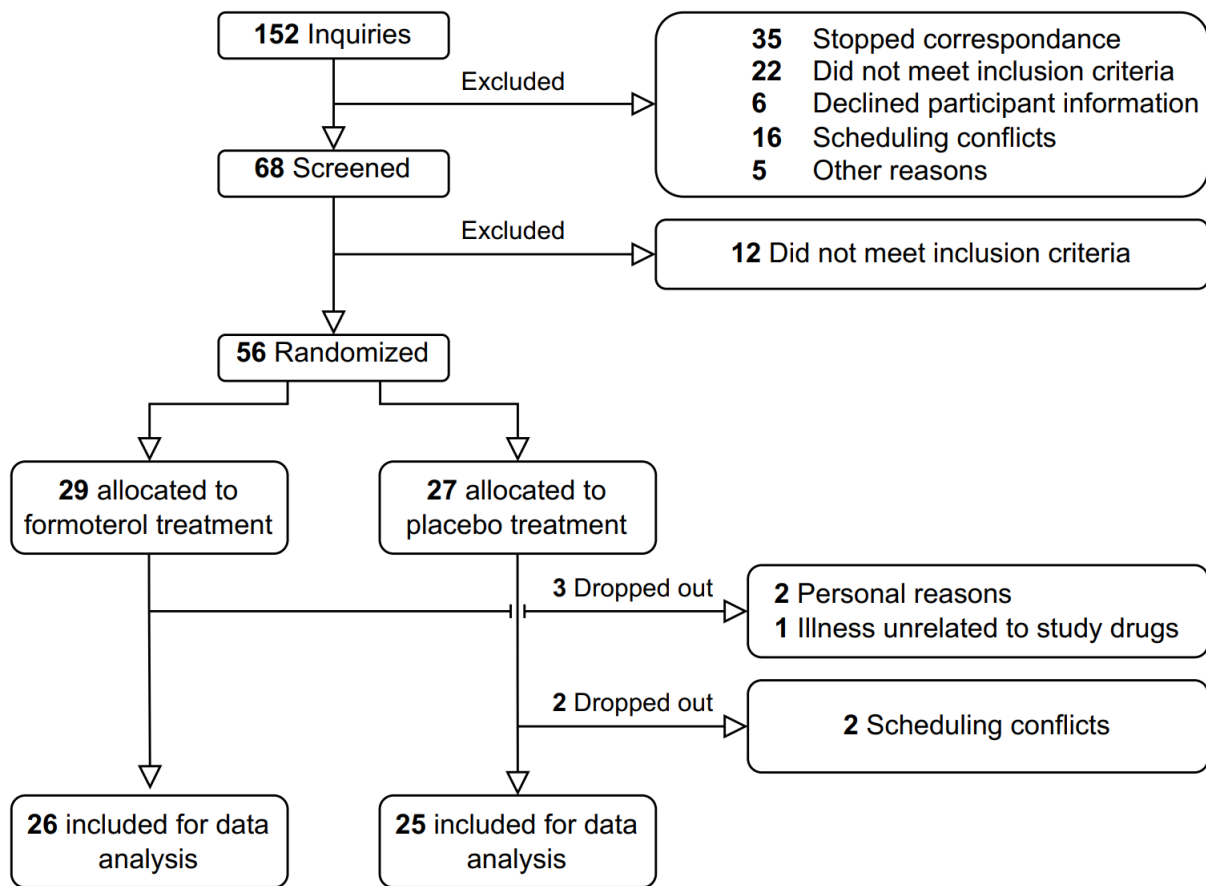

Figure 1. Participant flow diagram.

## Cardiac and haematological parameters

Table 1: Cardiac structure and function and haematological parameters before (Pre) and after (Post) 6 weeks of twice-daily administration of formoterol (48 µg/day) or placebo in endurance-trained participants (19 male 1 female). LV: left ventricle; Mitral valve E: transmitral early/passive filling velocity; Mitral valve A: transmitral late/active filling velocity; E/A ratio: ratio of mitral valve E and mitral valve A; s': average of septal and lateral mitral annular systolic longitudinal velocity; e': average of septal and lateral mitral annular early/passive diastolic longitudinal velocity; E/e': ratio of mitral valve E and e'; LV end diastolic volume, ejection fraction, and stroke volume are measured using biplane method. Pre and post values are mean ± SD. Effect size is mean change (95% confidence interval). \*different from pre within-group (p<0.05). #treatment×time interaction effect (p<0.05).

|                                              | Formoterol (n = 8-10) |             | Placebo (n = 8-10) |             |                                    |                     |
|----------------------------------------------|-----------------------|-------------|--------------------|-------------|------------------------------------|---------------------|
|                                              | Pre                   | Post        | Pre                | Post        | Formoterol vs. placebo effect size | Interaction p-value |
| <b>Left ventricle structure and volume</b>   |                       |             |                    |             |                                    |                     |
| LV posterior wall thickness (cm)             | 1.07 ± 0.17           | 1.11 ± 0.15 | 1.05 ± 0.15        | 1.07 ± 0.12 | 0.13 (-0.07 to 0.10)               | 0.757               |
| Interventricular septal wall thickness (cm)  | 1.11 ± 0.13           | 1.13 ± 0.14 | 1.12 ± 0.19        | 1.11 ± 0.13 | 0.03 (-0.05 to 0.11)               | 0.389               |
| LV end diastolic volume (mL)                 | 159 ± 27              | 157 ± 22    | 151 ± 15           | 145 ± 16    | 4 (-15 to 22)                      | 0.670               |
| Stroke volume (mL)                           | 95 ± 16               | 92 ± 14     | 85 ± 11            | 80 ± 10     | 2 (-10 to 15)                      | 0.698               |
| <b>Left ventricle systolic function</b>      |                       |             |                    |             |                                    |                     |
| LV ejection fraction (%)                     | 58 ± 3                | 58 ± 3      | 57 ± 4             | 55 ± 3      | 1 (-3 to 5)                        | 0.636               |
| Global longitudinal strain (%)               | -19.6 ± 1.9           | -19.2 ± 1.3 | -18.3 ± 1.6        | -17.7 ± 1.0 | -0.3 (-1.7 to 1.1)                 | 0.337               |
| s' (cm/s)                                    | 11 ± 1                | 11 ± 1      | 11 ± 2             | 11 ± 2      | 1 (-1 to 2)                        | 0.225               |
| <b>Left ventricle diastolic function</b>     |                       |             |                    |             |                                    |                     |
| Mitral valve E (cm/sec)                      | 102 ± 18              | 101 ± 26*   | 84 ± 18            | 78 ± 9      | 5 (-5 to 15)                       | 0.306               |
| Mitral valve A (cm/sec) #                    | 53 ± 14               | 41 ± 6      | 46 ± 0.13          | 47 ± 8      | -14 (-26 to -1)                    | 0.033               |
| E/A ratio #                                  | 2.1 ± 0.9             | 2.5 ± 0.7*  | 1.9 ± 0.5          | 1.8 ± 0.5   | 0.5 (0.8 to 0.9)                   | 0.024               |
| e' (cm/sec)                                  | 19 ± 1                | 19 ± 4      | 17 ± 3             | 16 ± 3      | 1 (-2 to 3)                        | 0.440               |
| E/e'                                         | 5.3 ± 0.8             | 5.3 ± 1.3   | 5.0 ± 0.8          | 5.1 ± 0.5   | 0 (-1 to 1)                        | 0.654               |
| <b>Haematological parameters</b>             |                       |             |                    |             |                                    |                     |
|                                              | Pre                   | Post        | Pre                | Post        | Formoterol vs. placebo effect size | Interaction p-value |
| Red blood cell count (10 <sup>3</sup> /µl)   | 4.7 ± 0.4             | 4.7 ± 0.3   | 4.8 ± 0.5          | 4.8 ± 0.4   | 0.1 (-0.1 to 0.2)                  | 0.879               |
| White blood cell count (10 <sup>3</sup> /µl) | 6.3 ± 1.8             | 5.8 ± 1.6   | 5.7 ± 1.3          | 6.1 ± 1.1   | -0.9 (-2 to 0.4)                   | 0.168               |
| Platelet count (10 <sup>3</sup> /µl)         | 196 ± 27              | 210 ± 37    | 217 ± 48           | 217 ± 49    | 13 (-8 to 34)                      | 0.216               |
| Neutrophil count (10 <sup>3</sup> /µl)       | 4.1 ± 1.7             | 3.6 ± 1.5   | 3.3 ± 1.2          | 3.9 ± 1     | -1.1 (-2 to 0.2)                   | 0.098               |
| Haematocrit (%)                              | 41 ± 2                | 41 ± 2      | 42 ± 3             | 42 ± 2      | 0 (-2 to 2)                        | 0.778               |

## Muscle mitochondrial respiration

Table 2: Muscle mass-specific and intrinsic mitochondrial respiration before (Pre) and after (Post) 6 weeks of twice-daily inhalation of either formoterol (48 µg/day; males n=5; females n=5) or placebo (males, n=5; females, n=5) in endurance-trained participants. Data are pooled for sexes. LN: leak respiration; FAOp: fatty acid oxidation; CIp: complex I coupled respiration; CI+CIIp: complex I+II coupled respiration; LOmy: oligomycin-induced leak respiration. Pre and post values are mean ± SD. Effect size is mean change (95% confidence interval). \*different from pre within-group (p<0.05). #treatment×time interaction effect (p<0.05).

|           | Formoterol (n = 10)                                                                                            |             |                          | Placebo (n = 10) |             |                         |
|-----------|----------------------------------------------------------------------------------------------------------------|-------------|--------------------------|------------------|-------------|-------------------------|
|           | <b>Muscle mass specific mitochondrial respiration<br/>(pmol O<sub>2</sub>/s/mg w.w.)</b>                       |             |                          |                  |             |                         |
|           | Pre                                                                                                            | Post        | Change<br>(95%CI)        | Pre              | Post        | Change<br>(95%CI)       |
| LN        | 11 ± 5                                                                                                         | 11 ± 3      | 0<br>(-3 to 2)           | 9 ± 4            | 11 ± 3      | 2<br>(-1 to 4)          |
| FAOp      | 56 ± 15                                                                                                        | 52 ± 9      | -4<br>(-10 to 3)         | 48 ± 11          | 52 ± 13     | 4<br>(-2 to 11)         |
| CIp #     | 85 ± 19                                                                                                        | 77 ± 18     | -8<br>(-17 to 0)         | 73 ± 14          | 77 ± 17     | 4<br>(-4 to 13)         |
| CI+CIIp # | 137 ± 28                                                                                                       | 123 ± 31    | -14*<br>(-27 to -2)      | 115 ± 19         | 123 ± 20    | 8<br>(-5 to 21)         |
| LOmy #    | 31 ± 8                                                                                                         | 29 ± 5      | -2<br>(-5 to 1)          | 26 ± 6           | 30 ± 6      | 4*<br>(1 to 7)          |
|           | <b>Muscle intrinsic mitochondrial respiration<br/>(pmol O<sub>2</sub>/s/mg w.w./citrate synthase activity)</b> |             |                          |                  |             |                         |
| LN        | 0.20 ± 0.09                                                                                                    | 0.25 ± 0.11 | 0.05<br>(-0.03 to 0.12)  | 0.16 ± 0.11      | 0.19 ± 0.05 | 0.03<br>(-0.05 to 0.10) |
| FAOp      | 1.04 ± 0.35                                                                                                    | 1.15 ± 0.25 | 0.11<br>(-0.07 to 0.292) | 0.85 ± 0.36      | 0.93 ± 0.32 | 0.08<br>(-0.10 to 0.27) |
| CIp       | 1.60 ± 0.53                                                                                                    | 1.70 ± 0.39 | 0.10<br>(-0.13 to 0.32)  | 1.30 ± 0.57      | 1.39 ± 0.48 | 0.09<br>(-0.14 to 0.31) |
| CI+CIIp   | 2.55 ± 0.74                                                                                                    | 2.71 ± 0.70 | 0.17<br>(-0.15 to 0.49)  | 2.02 ± 0.79      | 2.19 ± 0.64 | 0.18<br>(-0.14 to 0.50) |
| LOmy      | 0.55 ± 0.11                                                                                                    | 0.64 ± 0.14 | 0.09*<br>(0.14 to 0.17)  | 0.44 ± 0.14      | 0.53 ± 0.16 | 0.09*<br>(0.01 to 0.17) |
